# Supplementary material for: Spectral Domain Optical Coherence Tomography Assessment of Macular and Optic Nerve Alterations in Patients with Glaucoma and Correlation with Visual Field Index
Source: J Ophthalmol. 2018 Oct 8;2018:6581846. doi: 10.1155/2018/6581846 (PMC6196886; doi:10.1155/2018/6581846)
Supplement: Supplementary Materials — In the supplementary materials, AUC and Mann–Whitney p values for each comparison, complete descriptive statistics, and correlation of each parameter with VFI are reported. [file 6581846.f1.xlsx]

## Sheet: Foglio1
AUC and Mann Whitney p values for each comparison
CTRL vs. EG			CTRL vs. AG			EG vs. AG.
Index	AUC	P-Value Corrected	Index	AUC	P-Value Corrected	Index	AUC	P-Value Corrected
BMO_G	0.812987	0.000241627	BMO_G	0.937566	1.41489e-08	BMO_G	0.8367	0.000167041
BMO_N	0.757143	0.0037225	BMO_N	0.907937	1.32557e-07	BMO_N	0.76936	0.00403109
BMO_NI	0.861039	1.49625e-05	BMO_NI	0.911111	1.17469e-07	BMO_NI	0.717172	0.0268652
BMO_NS	0.853247	2.37778e-05	BMO_NS	0.94709	6.51688e-09	BMO_NS	0.774411	0.00326323
BMO_T	0.768831	0.00200646	BMO_T	0.918519	6.64877e-08	BMO_T	0.835017	0.000173497
BMO_TI	0.880519	4.68726e-06	BMO_TI	0.960847	2.06145e-09	BMO_TI	0.747475	0.00849781
BMO_TS	0.861039	1.61596e-05	BMO_TS	0.975661	5.47561e-10	BMO_TS	0.814815	0.000470662
Macula_GCL_Inferior_Inner	0.876623	8.55266e-06	Macula_GCL_Inferior_Inner	0.975661	5.47956e-10	Macula_GCL_Inferior_Inner	0.816498	0.000379453
Macula_GCL_Inferior_outer	0.868831	7.95947e-06	Macula_GCL_Inferior_outer	0.951323	4.7642e-09	Macula_GCL_Inferior_outer	0.808081	0.000735019
Macula_GCL_mean_Inner	0.881818	4.29449e-06	Macula_GCL_mean_Inner	0.978836	3.94592e-10	Macula_GCL_mean_Inner	0.888889	9.29422e-06
Macula_GCL_mean_Outer	0.892208	2.3797e-06	Macula_GCL_mean_Outer	0.980952	3.11259e-10	Macula_GCL_mean_Outer	0.936027	4.87372e-07
Macula_GCL_Nasal_Inner	0.702597	0.02958	Macula_GCL_Nasal_Inner	0.951323	4.827e-09	Macula_GCL_Nasal_Inner	0.821549	0.000296216
Macula_GCL_Nasal_outer	0.676623	0.0759651	Macula_GCL_Nasal_outer	0.91746	5.68052e-08	Macula_GCL_Nasal_outer	0.882155	1.02332e-05
Macula_GCL_Superior_Inner	0.767532	0.0019048	Macula_GCL_Superior_Inner	0.971429	8.36994e-10	Macula_GCL_Superior_Inner	0.868687	3.32767e-05
Macula_GCL_Superior_outer	0.8	0.000551855	Macula_GCL_Superior_outer	0.942857	8.73522e-09	Macula_GCL_Superior_outer	0.883838	8.57989e-06
Macula_GCL_Temporal_Inner	0.91039	6.40501e-07	Macula_GCL_Temporal_Inner	0.978836	3.59673e-10	Macula_GCL_Temporal_Inner	0.90404	3.5386e-06
Macula_GCL_Temporal_outer	0.925974	2.26545e-07	Macula_GCL_Temporal_outer	0.987302	1.6719e-10	Macula_GCL_Temporal_outer	0.900673	4.12819e-06
Macula_INL_Inferior_Inner	0.6	0.487521	Macula_INL_Inferior_Inner	0.666667	0.0841576	Macula_INL_Inferior_Inner	0.574074	1.0912
Macula_INL_Inferior_outer	0.624675	0.247014	Macula_INL_Inferior_outer	0.704762	0.0304472	Macula_INL_Inferior_outer	0.585859	1.14722
Macula_INL_mean_Inner	0.520779	2.32232	Macula_INL_mean_Inner	0.650794	0.133414	Macula_INL_mean_Inner	0.654882	0.210805
Macula_INL_mean_outer	0.620779	0.411757	Macula_INL_mean_outer	0.754497	0.00233129	Macula_INL_mean_outer	0.648148	0.224756
Macula_INL_Nasal_Inner	0.496104	2.78359	Macula_INL_Nasal_Inner	0.630688	0.246548	Macula_INL_Nasal_Inner	0.643098	0.258256
Macula_INL_Nasal_outer	0.614286	0.346312	Macula_INL_Nasal_outer	0.78836	0.000423182	Macula_INL_Nasal_outer	0.627946	0.333581
Macula_INL_Superior_Inner	0.537662	1.74314	Macula_INL_Superior_Inner	0.661376	0.114261	Macula_INL_Superior_Inner	0.686869	0.0832924
Macula_INL_Superior_outer	0.605195	0.448264	Macula_INL_Superior_outer	0.767196	0.00239615	Macula_INL_Superior_outer	0.681818	0.110547
Macula_INL_Temporal_Inner	0.505195	2.45152	Macula_INL_Temporal_Inner	0.615873	0.350205	Macula_INL_Temporal_Inner	0.572391	1.1724
Macula_INL_Temporal_outer	0.554545	1.3412	Macula_INL_Temporal_outer	0.643386	0.224181	Macula_INL_Temporal_outer	0.584175	1.0544
Macula_IPL_Inferior_Inner	0.814286	0.000181211	Macula_IPL_Inferior_Inner	0.957672	2.52865e-09	Macula_IPL_Inferior_Inner	0.772727	0.00297696
Macula_IPL_Inferior_outer	0.790909	0.00066332	Macula_IPL_Inferior_outer	0.806349	0.000174078	Macula_IPL_Inferior_outer	0.488215	2.23411
Macula_IPL_mean_Inner	0.84026	6.50852e-05	Macula_IPL_mean_Inner	0.973545	6.55705e-10	Macula_IPL_mean_Inner	0.892256	8.41719e-06
Macula_IPL_mean_Outer	0.828571	0.000122146	Macula_IPL_mean_Outer	0.904762	1.5952e-07	Macula_IPL_mean_Outer	0.752525	0.0078598
Macula_IPL_Nasal_Inner	0.696104	0.0391237	Macula_IPL_Nasal_Inner	0.916402	8.29394e-08	Macula_IPL_Nasal_Inner	0.814815	0.000386423
Macula_IPL_Nasal_outer	0.620779	0.38196	Macula_IPL_Nasal_outer	0.827513	4.01202e-05	Macula_IPL_Nasal_outer	0.808081	0.000739326
Macula_IPL_Superior_Inner	0.719481	0.0155335	Macula_IPL_Superior_Inner	0.946032	6.85604e-09	Macula_IPL_Superior_Inner	0.888889	1.05887e-05
Macula_IPL_Superior_outer	0.815584	0.000151415	Macula_IPL_Superior_outer	0.840212	3.52581e-05	Macula_IPL_Superior_outer	0.604377	0.73347
Macula_IPL_Temporal_Inner	0.883117	4.81767e-06	Macula_IPL_Temporal_Inner	0.989418	1.67747e-10	Macula_IPL_Temporal_Inner	0.883838	1.42929e-05
Macula_IPL_Temporal_outer	0.923377	3.56427e-07	Macula_IPL_Temporal_outer	0.977778	4.17523e-10	Macula_IPL_Temporal_outer	0.799663	0.000819931
Macula_IRL_Inferior_Inner	0.755844	0.00360458	Macula_IRL_Inferior_Inner	0.906878	1.60814e-07	Macula_IRL_Inferior_Inner	0.76431	0.0043123
Macula_IRL_Inferior_outer	0.784416	0.00115135	Macula_IRL_Inferior_outer	0.918519	6.55221e-08	Macula_IRL_Inferior_outer	0.742424	0.0113097
Macula_IRL_mean_Inner	0.784416	0.00102271	Macula_IRL_mean_Inner	0.938624	1.2455e-08	Macula_IRL_mean_Inner	0.83165	0.00019788
Macula_IRL_mean_outer	0.751948	0.00467246	Macula_IRL_mean_outer	0.901587	2.21846e-07	Macula_IRL_mean_outer	0.83165	0.000215068
Macula_IRL_Nasal_Inner	0.64026	0.233531	Macula_IRL_Nasal_Inner	0.851852	6.07549e-06	Macula_IRL_Nasal_Inner	0.777778	0.00261105
Macula_IRL_Nasal_outer	0.572727	1.11404	Macula_IRL_Nasal_outer	0.871958	1.92091e-06	Macula_IRL_Nasal_outer	0.856902	3.77909e-05
Macula_IRL_Superior_Inner	0.749351	0.00491758	Macula_IRL_Superior_Inner	0.942857	1.17673e-08	Macula_IRL_Superior_Inner	0.841751	0.000127282
Macula_IRL_Superior_outer	0.750649	0.00647493	Macula_IRL_Superior_outer	0.851852	6.05931e-06	Macula_IRL_Superior_outer	0.799663	0.000751087
Macula_IRL_Temporal_Inner	0.855844	2.09455e-05	Macula_IRL_Temporal_Inner	0.972487	6.49936e-10	Macula_IRL_Temporal_Inner	0.813131	0.00052962
Macula_IRL_Temporal_outer	0.811688	0.000324395	Macula_IRL_Temporal_outer	0.904762	1.66643e-07	Macula_IRL_Temporal_outer	0.705387	0.0356933
Macula_ONL_Inferior_Inner	0.572727	0.974409	Macula_ONL_Inferior_Inner	0.634921	0.234336	Macula_ONL_Inferior_Inner	0.506734	2.7835
Macula_ONL_Inferior_outer	0.538961	1.88447	Macula_ONL_Inferior_outer	0.534392	2.11899	Macula_ONL_Inferior_outer	0.489899	2.61612
Macula_ONL_mean_Inner	0.623377	0.324326	Macula_ONL_mean_Inner	0.667725	0.0718709	Macula_ONL_mean_Inner	0.473064	2.1975
Macula_ONL_mean_outer	0.545455	1.66508	Macula_ONL_mean_outer	0.557672	1.3807	Macula_ONL_mean_outer	0.484848	2.56916
Macula_ONL_Nasal_Inner	0.638961	0.184178	Macula_ONL_Nasal_Inner	0.57037	0.991053	Macula_ONL_Nasal_Inner	0.624579	0.401562
Macula_ONL_Nasal_outer	0.633766	0.241385	Macula_ONL_Nasal_outer	0.601058	0.524409	Macula_ONL_Nasal_outer	0.575758	1.03201
Macula_ONL_Superior_Inner	0.661039	0.13078	Macula_ONL_Superior_Inner	0.646561	0.165128	Macula_ONL_Superior_Inner	0.481481	2.42774
Macula_ONL_Superior_outer	0.537662	1.78135	Macula_ONL_Superior_outer	0.584127	0.87803	Macula_ONL_Superior_outer	0.540404	2.03853
Macula_ONL_Temporal_Inner	0.527273	2.06288	Macula_ONL_Temporal_Inner	0.662434	0.100879	Macula_ONL_Temporal_Inner	0.63468	0.322172
Macula_ONL_Temporal_outer	0.47013	2.35902	Macula_ONL_Temporal_outer	0.532275	2.23074	Macula_ONL_Temporal_outer	0.563973	1.46052
Macula_OPL_Inferior_Inner	0.564935	1.07183	Macula_OPL_Inferior_Inner	0.621164	0.403223	Macula_OPL_Inferior_Inner	0.494949	2.97584
Macula_OPL_Inferior_outer	0.512987	2.2786	Macula_OPL_Inferior_outer	0.550265	1.61316	Macula_OPL_Inferior_outer	0.526936	2.08946
Macula_OPL_mean_Inner	0.7	0.0322454	Macula_OPL_mean_Inner	0.643386	0.17928	Macula_OPL_mean_Inner	0.621212	0.450917
Macula_OPL_mean_outer	0.62987	0.307348	Macula_OPL_mean_outer	0.587302	0.812044	Macula_OPL_mean_outer	0.543771	1.73937
Macula_OPL_Nasal_Inner	0.68961	0.039217	Macula_OPL_Nasal_Inner	0.543915	1.75161	Macula_OPL_Nasal_Inner	0.636364	0.274434
Macula_OPL_Nasal_outer	0.612987	0.377203	Macula_OPL_Nasal_outer	0.551323	1.62044	Macula_OPL_Nasal_outer	0.550505	1.41946
Macula_OPL_Superior_Inner	0.679221	0.0611199	Macula_OPL_Superior_Inner	0.587302	0.84711	Macula_OPL_Superior_Inner	0.612795	0.490366
Macula_OPL_Superior_outer	0.536364	1.83782	Macula_OPL_Superior_outer	0.511111	2.86259	Macula_OPL_Superior_outer	0.553872	1.68549
Macula_OPL_Temporal_Inner	0.58961	0.726039	Macula_OPL_Temporal_Inner	0.642328	0.244976	Macula_OPL_Temporal_Inner	0.545455	1.5335
Macula_OPL_Temporal_outer	0.581818	0.754868	Macula_OPL_Temporal_outer	0.565079	1.53876	Macula_OPL_Temporal_outer	0.553872	1.66201
Macula_PHOTO_Fovea	0.663636	0.112586	Macula_PHOTO_Fovea	0.608466	0.54895	Macula_PHOTO_Fovea	0.599327	0.70991
Macula_PHOTO_Inferior_Inner	0.667532	0.0702674	Macula_PHOTO_Inferior_Inner	0.561905	1.39555	Macula_PHOTO_Inferior_Inner	0.619529	0.494562
Macula_PHOTO_Inferior_outer	0.664935	0.0573708	Macula_PHOTO_Inferior_outer	0.491005	1.84353	Macula_PHOTO_Inferior_outer	0.644781	0.322635
Macula_PHOTO_mean_Inner	0.666234	0.125369	Macula_PHOTO_mean_Inner	0.50582	2.79612	Macula_PHOTO_mean_Inner	0.62963	0.408669
Macula_PHOTO_mean_outer	0.631169	0.236875	Macula_PHOTO_mean_outer	0.480423	2.151	Macula_PHOTO_mean_outer	0.611111	0.592419
Macula_PHOTO_Nasal_Inner	0.606494	0.635311	Macula_PHOTO_Nasal_Inner	0.516402	2.59157	Macula_PHOTO_Nasal_Inner	0.616162	0.705392
Macula_PHOTO_Nasal_outer	0.602597	0.471768	Macula_PHOTO_Nasal_outer	0.497354	2.35736	Macula_PHOTO_Nasal_outer	0.580808	1.09421
Macula_PHOTO_Superior_Inner	0.574026	0.99857	Macula_PHOTO_Superior_Inner	0.592593	0.651601	Macula_PHOTO_Superior_Inner	0.666667	0.192317
Macula_PHOTO_Superior_outer	0.564935	1.26794	Macula_PHOTO_Superior_outer	0.508995	2.98288	Macula_PHOTO_Superior_outer	0.579125	1.26636
Macula_PHOTO_Temporal_Inner	0.644156	0.15847	Macula_PHOTO_Temporal_Inner	0.519577	2.64151	Macula_PHOTO_Temporal_Inner	0.62963	0.353873
Macula_PHOTO_Temporal_outer	0.644156	0.163093	Macula_PHOTO_Temporal_outer	0.566138	1.63738	Macula_PHOTO_Temporal_outer	0.622896	0.616069
Macula_RETINA_Fovea	0.692208	0.0362688	Macula_RETINA_Fovea	0.728042	0.00834584	Macula_RETINA_Fovea	0.518519	2.49806
Macula_RETINA_Inferior_Inner	0.788312	0.000789279	Macula_RETINA_Inferior_Inner	0.926984	2.99693e-08	Macula_RETINA_Inferior_Inner	0.752525	0.00743215
Macula_RETINA_Inferior_outer	0.796104	0.000611914	Macula_RETINA_Inferior_outer	0.899471	2.79797e-07	Macula_RETINA_Inferior_outer	0.700337	0.0448923
Macula_RETINA_mean_Inner	0.805195	0.00035077	Macula_RETINA_mean_Inner	0.93545	1.60663e-08	Macula_RETINA_mean_Inner	0.799663	0.000888611
Macula_RETINA_mean_Outer	0.768831	0.00219608	Macula_RETINA_mean_Outer	0.896296	3.28439e-07	Macula_RETINA_mean_Outer	0.787879	0.00182613
Macula_RETINA_Nasal_Inner	0.677922	0.0707425	Macula_RETINA_Nasal_Inner	0.849735	8.58893e-06	Macula_RETINA_Nasal_Inner	0.747475	0.00846821
Macula_RETINA_Nasal_outer	0.605195	0.544149	Macula_RETINA_Nasal_outer	0.871958	1.92216e-06	Macula_RETINA_Nasal_outer	0.845118	9.82474e-05
Macula_RETINA_Superior_Inner	0.751948	0.00415541	Macula_RETINA_Superior_Inner	0.926984	3.25976e-08	Macula_RETINA_Superior_Inner	0.809764	0.000617809
Macula_RETINA_Superior_outer	0.772727	0.00193568	Macula_RETINA_Superior_outer	0.846561	9.17533e-06	Macula_RETINA_Superior_outer	0.771044	0.00387028
Macula_RETINA_Temporal_Inner	0.861039	1.59568e-05	Macula_RETINA_Temporal_Inner	0.960847	1.92672e-09	Macula_RETINA_Temporal_Inner	0.784512	0.0020211
Macula_RETINA_Temporal_outer	0.814286	0.000224297	Macula_RETINA_Temporal_outer	0.889947	3.79094e-07	Macula_RETINA_Temporal_outer	0.66835	0.142608
Macula_RNFL_Fovea	0.662338	0.113155	Macula_RNFL_Fovea	0.873016	2.13022e-06	Macula_RNFL_Fovea	0.651515	0.163099
Macula_RNFL_Inferior_Inner	0.822078	7.77971e-05	Macula_RNFL_Inferior_Inner	0.936508	2.08828e-08	Macula_RNFL_Inferior_Inner	0.685185	0.0743435
Macula_RNFL_Inferior_outer	0.858442	1.30264e-05	Macula_RNFL_Inferior_outer	0.965079	1.43398e-09	Macula_RNFL_Inferior_outer	0.80303	0.000891071
Macula_RNFL_mean_Inner	0.790909	0.000603651	Macula_RNFL_mean_Inner	0.924868	5.05311e-08	Macula_RNFL_mean_Inner	0.739057	0.0123342
Macula_RNFL_mean_outer	0.85974	1.6614e-05	Macula_RNFL_mean_outer	0.97672	4.46656e-10	Macula_RNFL_mean_outer	0.907407	3.41429e-06
Macula_RNFL_Nasal_Inner	0.624675	0.191497	Macula_RNFL_Nasal_Inner	0.759788	0.00240519	Macula_RNFL_Nasal_Inner	0.617845	0.335534
Macula_RNFL_Nasal_outer	0.774026	0.00108851	Macula_RNFL_Nasal_outer	0.956614	2.80155e-09	Macula_RNFL_Nasal_outer	0.910774	1.70841e-06
Macula_RNFL_Superior_Inner	0.71039	0.019431	Macula_RNFL_Superior_Inner	0.924868	6.37516e-08	Macula_RNFL_Superior_Inner	0.791246	0.000834907
Macula_RNFL_Superior_outer	0.733766	0.00858807	Macula_RNFL_Superior_outer	0.937566	1.3175e-08	Macula_RNFL_Superior_outer	0.872054	2.11111e-05
Macula_RNFL_Temporal_Inner	0.535065	1.09228	Macula_RNFL_Temporal_Inner	0.566138	1.1668	Macula_RNFL_Temporal_Inner	0.621212	0.430913
Macula_RNFL_Temporal_outer	0.725974	0.00725335	Macula_RNFL_Temporal_outer	0.687831	0.0281186	Macula_RNFL_Temporal_outer	0.501684	2.97553
Macula_RPE_Fovea	0.527273	1.96603	Macula_RPE_Fovea	0.551323	1.71999	Macula_RPE_Fovea	0.5	2.80378
Macula_RPE_Inferior_Inner	0.54026	1.92167	Macula_RPE_Inferior_Inner	0.554497	1.748	Macula_RPE_Inferior_Inner	0.508418	2.92646
Macula_RPE_Inferior_outer	0.557143	1.16305	Macula_RPE_Inferior_outer	0.543915	2.56775	Macula_RPE_Inferior_outer	0.609428	0.714011
Macula_RPE_mean_Inner	0.538961	1.95489	Macula_RPE_mean_Inner	0.521693	2.31197	Macula_RPE_mean_Inner	0.56734	1.1566
Macula_RPE_mean_outer	0.590909	0.73946	Macula_RPE_mean_outer	0.541799	1.73642	Macula_RPE_mean_outer	0.649832	0.263966
Macula_RPE_Nasal_Inner	0.505195	2.7813	Macula_RPE_Nasal_Inner	0.541799	1.84572	Macula_RPE_Nasal_Inner	0.53367	2.395
Macula_RPE_Nasal_outer	0.571429	1.31868	Macula_RPE_Nasal_outer	0.562963	1.33758	Macula_RPE_Nasal_outer	0.616162	0.509921
Macula_RPE_Superior_Inner	0.503896	2.8802	Macula_RPE_Superior_Inner	0.577778	1.18011	Macula_RPE_Superior_Inner	0.585859	1.10796
Macula_RPE_Superior_outer	0.594805	0.917893	Macula_RPE_Superior_outer	0.526984	2.249	Macula_RPE_Superior_outer	0.626263	0.533443
Macula_RPE_Temporal_Inner	0.614286	0.466691	Macula_RPE_Temporal_Inner	0.51746	2.68984	Macula_RPE_Temporal_Inner	0.63468	0.354126
Macula_RPE_Temporal_outer	0.596104	0.546098	Macula_RPE_Temporal_outer	0.591534	0.762985	Macula_RPE_Temporal_outer	0.680135	0.0646455
mean_GANGLION_CELL_LAYER	0.905195	9.86195e-07	mean_GANGLION_CELL_LAYER	0.98836	1.78465e-10	mean_GANGLION_CELL_LAYER	0.925926	1.04181e-06
mean_INNER_NUCLEAR_LAYER	0.532468	2.02781	mean_INNER_NUCLEAR_LAYER	0.667725	0.0732748	mean_INNER_NUCLEAR_LAYER	0.653199	0.211257
mean_INNER_PLEXIFORM_LAYER	0.807792	0.000317318	mean_INNER_PLEXIFORM_LAYER	0.896296	3.28921e-07	mean_INNER_PLEXIFORM_LAYER	0.754209	0.00696887
mean_INNER_RETINAL_LAYER	0.807792	0.00029669	mean_INNER_RETINAL_LAYER	0.928042	2.91345e-08	mean_INNER_RETINAL_LAYER	0.833333	0.000198135
mean_OUTER_NUCLEAR_LAYER	0.536364	1.9211	mean_OUTER_NUCLEAR_LAYER	0.585185	0.759212	mean_OUTER_NUCLEAR_LAYER	0.542088	1.8885
mean_OUTER_PLEXIFORM_LAYER	0.594805	0.703961	mean_OUTER_PLEXIFORM_LAYER	0.603175	0.511963	mean_OUTER_PLEXIFORM_LAYER	0.542088	1.84585
mean_PHOTORECEPTORS	0.667532	0.105508	mean_PHOTORECEPTORS	0.575661	0.930114	mean_PHOTORECEPTORS	0.575758	1.09699
mean_RET_PIGMENT_EPITHELIUM	0.616883	0.440481	mean_RET_PIGMENT_EPITHELIUM	0.537566	1.82779	mean_RET_PIGMENT_EPITHELIUM	0.636364	0.31034
mean_Retina	0.807792	0.00030696	mean_Retina	0.922751	4.41648e-08	mean_Retina	0.813131	0.000533067
mean_RNFL	0.88961	2.51857e-06	mean_RNFL	0.982011	3.14624e-10	mean_RNFL	0.925926	9.886e-07
RNFLT__N	0.812987	0.000215841	RNFLT__N	0.967196	1.18479e-09	RNFLT__N	0.893939	9.57514e-06
RNFLT_G	0.885714	3.19772e-06	RNFLT_G	0.983069	2.68425e-10	RNFLT_G	0.936027	7.41664e-07
RNFLT_NI	0.855844	2.0292e-05	RNFLT_NI	0.952381	4.17932e-09	RNFLT_NI	0.801347	0.000810259
RNFLT_NS	0.91039	7.21722e-07	RNFLT_NS	0.933333	1.81799e-08	RNFLT_NS	0.717172	0.0284279
RNFLT_T	0.812987	0.000274146	RNFLT_T	0.956614	2.43492e-09	RNFLT_T	0.845118	0.000116889
RNFLT_TI	0.902597	1.11847e-06	RNFLT_TI	0.97037	8.6585e-10	RNFLT_TI	0.791246	0.00140452
RNFLT_TS	0.88961	2.83685e-06	RNFLT_TS	0.984127	2.70908e-10	RNFLT_TS	0.905724	4.33798e-06
VFI	0.887013	2.14775e-06	VFI	1	3.81295e-11	VFI	1	6.5955e-09
Descriptive statistics control group
Index	Mean	Median	InterquartileRange_low	InterquartileRange_high	Min	Max	StandardDeviation	MedianDeviation
BMO_G	291.429	316	249	343	92	435	85.5973	59
BMO_N	323.914	344	247	386	76	527	100.274	64
BMO_NI	360.886	389	301	440	91	518	102.048	64
BMO_NS	344.6	345	262	414	124	563	108.258	75
BMO_T	205.914	204	167	256	63	308	60.3204	37
BMO_TI	308.171	315	265	376	108	449	86.4453	52
BMO_TS	288.314	293	236	337	100	457	89.39	57
Macula_GCL_Fovea	16.7714	15	13	17	10	30	5.80104	2
Macula_GCL_Inferior_Inner	52.1429	53	51	56	23	60	6.32522	2
Macula_GCL_Inferior_outer	31.5429	31	29	35	21	40	3.88317	2
Macula_GCL_mean_Inner	51.25	52	50.25	54.75	24.25	59.5	6.07218	2.25
Macula_GCL_mean_Outer	35.2929	35.5	32.75	38.5	23.25	42.5	4.14023	3
Macula_GCL_Nasal_Inner	51.6286	52	50	55	23	62	6.3759	2
Macula_GCL_Nasal_outer	39.6571	40	36	44	26	48	5.47692	4
Macula_GCL_Superior_Inner	52.0857	53	49	56	32	60	5.61181	3
Macula_GCL_Superior_outer	32.3143	32	30	35	21	38	3.41942	2
Macula_GCL_Temporal_Inner	49.1429	51	47	53	19	57	7.01319	3
Macula_GCL_Temporal_outer	37.6571	39	35	40	21	46	5.11597	3
Macula_INL_Fovea	21.6857	21	19	24	13	38	5.8197	3
Macula_INL_Inferior_Inner	40.6286	41	39	42	33	48	3.03979	2
Macula_INL_Inferior_outer	30.7714	31	29	32	27	36	2.11557	1
Macula_INL_mean_Inner	40.6786	40.25	38.5	42.75	34.5	47.25	3.02354	2.25
Macula_INL_mean_outer	32.55	32.5	31	34	29	38.25	2.18854	1.5
Macula_INL_Nasal_Inner	41.8	42	38	44	36	50	4.07864	4
Macula_INL_Nasal_outer	34.5429	34	32	36	30	42	2.70449	2
Macula_INL_Superior_Inner	41.3714	41	38	44	34	50	4.13084	3
Macula_INL_Superior_outer	31.1714	30	29	33	27	40	2.97525	1
Macula_INL_Temporal_Inner	38.9143	39	38	41	33	45	3.02316	2
Macula_INL_Temporal_outer	33.7143	34	33	35	28	39	2.45634	1
Macula_IPL_Fovea	23.4286	23	20	25	16	41	4.91268	2
Macula_IPL_Inferior_Inner	41.6571	42	39	45	29	48	3.87255	3
Macula_IPL_Inferior_outer	25.5429	25	24	27	21	33	3.02288	2
Macula_IPL_mean_Inner	41.7	42	39.5	44.75	28.75	47.75	4.11856	2.5
Macula_IPL_mean_Outer	28.9	29.25	26.25	31	22.5	34.75	2.97922	2.5
Macula_IPL_Nasal_Inner	41.6571	42	39	44	29	50	4.31783	3
Macula_IPL_Nasal_outer	30.9429	31	28	33	22	39	3.99222	3
Macula_IPL_Superior_Inner	41	41	38	44	28	50	4.98822	3
Macula_IPL_Superior_outer	26.2857	26	24	28	22	30	2.35861	2
Macula_IPL_Temporal_Inner	42.4857	43	40	45	28	52	4.57211	2
Macula_IPL_Temporal_outer	32.8286	33	31	35	24	39	3.43413	2
Macula_IRL_Fovea	196.743	191	178	208	165	270	24.8837	13
Macula_IRL_Inferior_Inner	262	269	253	276	193	286	18.7303	11
Macula_IRL_Inferior_outer	205.657	207	195	219	167	234	16.5582	12
Macula_IRL_mean_Inner	261.664	267.5	252.5	272	228.5	286	15.3856	13.25
Macula_IRL_mean_outer	216.571	214.75	206	232.5	183.75	241	16.0908	11.5
Macula_IRL_Nasal_Inner	265.286	265	254	274	233	295	15.6065	10
Macula_IRL_Nasal_outer	237	232	226	257	194	267	18.4407	16
Macula_IRL_Superior_Inner	264.4	266	251	279	231	290	15.8656	13
Macula_IRL_Superior_outer	211.543	209	202	225	174	239	16.4126	9
Macula_IRL_Temporal_Inner	254.971	257	246	265	219	279	15.0362	11
Macula_IRL_Temporal_outer	212.086	213	200	225	181	257	16.9539	12
Macula_ONL_Fovea	93.8857	93	86	101	81	114	9.50471	7
Macula_ONL_Inferior_Inner	66.5429	66	60	76	41	87	11.1733	9
Macula_ONL_Inferior_outer	50.1429	51	45	56	31	64	8.40218	5
Macula_ONL_mean_Inner	68.9643	68.5	62.25	78	54.75	82.5	8.34	7.5
Macula_ONL_mean_outer	55.3214	57.25	48.75	61.5	38.25	68.5	8.45654	6.25
Macula_ONL_Nasal_Inner	69.6286	71	63	81	40	90	13.8268	10
Macula_ONL_Nasal_outer	54.9429	55	45	65	40	70	10.264	10
Macula_ONL_Superior_Inner	66.6286	66	60	76	50	83	9.8222	10
Macula_ONL_Superior_outer	57.6	59	52	63	40	73	7.84107	6
Macula_ONL_Temporal_Inner	73.0571	74	65	82	50	89	10.2669	8
Macula_ONL_Temporal_outer	58.6	60	53	65	38	89	10.0884	5
Macula_OPL_Fovea	27.4286	27	23	30	16	43	5.88261	3
Macula_OPL_Inferior_Inner	35.5143	33	30	38	27	60	7.89777	4
Macula_OPL_Inferior_outer	27.8571	28	26	30	22	38	3.20975	2
Macula_OPL_mean_Inner	35.8071	34.25	31.75	39.5	28.5	48.5	5.3561	3
Macula_OPL_mean_outer	29.3143	29.5	27.75	30.5	24	38.25	2.92765	1.25
Macula_OPL_Nasal_Inner	38.4286	34	30	45	25	70	11.7405	5
Macula_OPL_Nasal_outer	33	32	29	37	24	49	5.74456	4
Macula_OPL_Superior_Inner	36.4286	33	31	37	27	64	9.13714	3
Macula_OPL_Superior_outer	27.3714	27	26	28	23	35	3.05908	1
Macula_OPL_Temporal_Inner	32.8571	31	29	34	24	55	7.18308	2
Macula_OPL_Temporal_outer	29.0286	28	26	31	24	40	3.60951	2
Macula_PHOTO_Fovea	89.2	89	86	93	77	98	4.97523	3
Macula_PHOTO_Inferior_Inner	80.9714	81	79	82	76	88	2.56086	1
Macula_PHOTO_Inferior_outer	77.4857	78	76	79	71	81	2.34359	1
Macula_PHOTO_mean_Inner	81.2357	81	79.5	82.75	76.5	87.5	2.43816	1.5
Macula_PHOTO_mean_outer	78.3929	78.75	77	80	73.25	82	2.06448	1.5
Macula_PHOTO_Nasal_Inner	81.8286	82	80	84	76	87	2.79164	2
Macula_PHOTO_Nasal_outer	78.6857	79	77	81	73	83	2.33605	2
Macula_PHOTO_Superior_Inner	81.2286	81	80	83	78	88	2.59055	1
Macula_PHOTO_Superior_outer	79.1143	79	77	81	75	83	2.21985	2
Macula_PHOTO_Temporal_Inner	80.9143	81	79	82	76	88	2.55954	2
Macula_PHOTO_Temporal_outer	78.2857	79	77	80	73	83	2.29541	1
Macula_RETINA_Fovea	285.914	280	273	296	255	351	22.4544	13
Macula_RETINA_Inferior_Inner	344.4	350	337	356	311	365	15.2589	12
Macula_RETINA_Inferior_outer	283.086	284	274	296	240	312	17.2633	11
Macula_RETINA_mean_Inner	343.243	348.75	333.25	352.5	309.5	364.5	15.0626	12
Macula_RETINA_mean_Outer	294.971	293.5	285.75	310	260	319.25	16.4445	11.75
Macula_RETINA_Nasal_Inner	347.629	350	336	361	314	376	15.8635	12
Macula_RETINA_Nasal_outer	316.229	314	305	334	274	347	18.8712	15
Macula_RETINA_Superior_Inner	345.571	347	334	359	312	368	16.0244	12
Macula_RETINA_Superior_outer	290.914	290	283	302	254	318	16.4717	9
Macula_RETINA_Temporal_Inner	335.371	340	327	347	301	356	14.9432	9
Macula_RETINA_Temporal_outer	289.657	291	280	302	254	315	16.228	11
Macula_RNFL_Fovea	14.4571	14	13	15	10	23	3.18399	1
Macula_RNFL_Inferior_Inner	27	27	26	28	20	36	3.71008	1
Macula_RNFL_Inferior_outer	39.9714	40	37	44	18	59	7.92793	3
Macula_RNFL_mean_Inner	23.4429	22.75	21.5	24.25	19.75	33	2.89972	1.25
Macula_RNFL_mean_outer	35.3714	34.75	33.5	37	21.25	51	5.554	1.5
Macula_RNFL_Nasal_Inner	22.1714	22	20	23	17	34	3.32093	1
Macula_RNFL_Nasal_outer	43.6857	43	41	48	21	67	8.5501	2
Macula_RNFL_Superior_Inner	26.3714	26	23	28	19	40	4.69095	2
Macula_RNFL_Superior_outer	36.5429	37	33	40	19	53	7.15929	3
Macula_RNFL_Temporal_Inner	18.2286	18	17	19	15	23	1.71646	1
Macula_RNFL_Temporal_outer	21.2857	19	19	21	16	45	6.06616	1
Macula_RPE_Fovea	16.8286	17	15	19	12	21	2.5145	2
Macula_RPE_Inferior_Inner	15	15	14	16	11	19	1.69775	1
Macula_RPE_Inferior_outer	13.2286	13	12	14	11	16	1.43662	1
Macula_RPE_mean_Inner	15.2571	15.5	13.75	16.5	12.25	18.25	1.65441	1.25
Macula_RPE_mean_outer	13.5429	13.75	12.5	14.5	11	16	1.2595	1
Macula_RPE_Nasal_Inner	15.8	16	14	18	13	20	1.92201	2
Macula_RPE_Nasal_outer	13.8	14	13	15	11	17	1.49115	1
Macula_RPE_Superior_Inner	15	15	13	16	12	19	1.78227	1
Macula_RPE_Superior_outer	13.7429	14	13	15	10	16	1.50182	1
Macula_RPE_Temporal_Inner	15.2286	16	14	16	12	20	1.80009	1
Macula_RPE_Temporal_outer	13.4	13	13	14	11	17	1.26491	1
mean_GANGLION_CELL_LAYER	31.0996	31.5938	29.2656	33.2031	23.3594	36.5625	2.89506	2.14062
mean_INNER_NUCLEAR_LAYER	30.4174	30.1719	29.0469	31.6562	27.7969	34.1094	1.87237	1.48438
mean_INNER_PLEXIFORM_LAYER	26.0272	26.3438	24.0938	27.9062	21.375	30.1875	2.22429	1.82812
mean_INNER_RETINAL_LAYER	209.235	207.266	200.719	222.75	175.781	231.578	14.8253	10.8125
mean_OUTER_NUCLEAR_LAYER	53.1317	55.3125	47.7656	58.2188	36.7031	64.5156	6.92485	4.28125
mean_OUTER_PLEXIFORM_LAYER	27.9866	27.7969	26.6094	29.2188	22.5312	35.25	2.61634	1.1875
mean_PHOTORECEPTORS	78.3487	78.8125	77	80.0625	73.5938	82.6719	2.07073	1.32812
mean_RET_PIGMENT_EPITHELIUM	13.3232	13.4219	12.3281	13.8906	11.6562	15.3281	1.00184	0.703125
mean_Retina	287.808	287.578	277.891	302.062	253.562	312.375	15.451	10.8125
mean_RNFL	40.7786	40.9375	38.6094	42.7344	23.1094	58.6719	6.64871	2.1875
RNFLT__N	85.0857	72	64	83	41	384	58.0879	8
RNFLT_G	100	90	79	97	47	323	55.8354	9
RNFLT_NI	105.429	90	76	108	49	382	66.0139	16
RNFLT_NS	113.286	103	90	115	39	357	56.4356	12
RNFLT_T	77.8	63	53	74	45	372	58.1048	10
RNFLT_TI	141.229	134	121	150	37	385	57.3996	14
RNFLT_TS	128.771	113	101	138	38	413	61.3606	17
VFI	98.1429	99	98	99	85	100	3.17289	1
Descriptive statistics initial stages group
Index	Mean	Median	InterquartileRange_low	InterquartileRange_high	Min	Max	StandardDeviation	MedianDeviation
BMO_G	195.545	181.5	157	221	106	350	58.0941	29
BMO_N	234.636	203	172	295	95	410	86.4262	51
BMO_NI	217.5	212.5	168	269	87	395	77.8367	56
BMO_NS	206.818	199.5	166	230	86	414	73.4203	32
BMO_T	161.955	161	142	172	103	264	35.6417	18
BMO_TI	164.182	157	110	203	57	340	78.037	47
BMO_TS	162.045	146	119	200	55	324	68.5096	36
Macula_GCL_Fovea	14.7727	14	10	19	9	26	4.97548	4
Macula_GCL_Inferior_Inner	41.4545	44	38	48	18	55	10.2341	5
Macula_GCL_Inferior_outer	26.3182	26.5	25	28	20	31	2.96626	1.5
Macula_GCL_mean_Inner	42.0341	43.125	39.25	45.75	19.25	54	7.48065	3
Macula_GCL_mean_Outer	29.7614	30.125	27.75	32.25	25	33.25	2.50176	2.125
Macula_GCL_Nasal_Inner	45.9091	49	41	53	19	56	9.03385	5
Macula_GCL_Nasal_outer	36.8182	37.5	34	39	28	42	3.6857	2
Macula_GCL_Superior_Inner	44.9545	47	41	52	22	55	9.35275	5.5
Macula_GCL_Superior_outer	28.4545	29.5	27	31	22	32	3.31989	1.5
Macula_GCL_Temporal_Inner	35.8182	35	29	42	18	51	8.29019	6
Macula_GCL_Temporal_outer	27.4545	26.5	24	31	19	36	4.65707	3.5
Macula_INL_Fovea	19.0909	20	15	22	13	28	4.21911	3
Macula_INL_Inferior_Inner	41.8182	42	40	44	37	47	2.77122	2
Macula_INL_Inferior_outer	32	32	30	34	28	37	2.60037	2
Macula_INL_mean_Inner	40.75	41.125	38.75	43.5	34.5	46.75	3.20342	2.375
Macula_INL_mean_outer	33.5114	33.125	31.25	35.5	30.75	37.5	2.34454	2.125
Macula_INL_Nasal_Inner	41.2727	42	39	45	33	50	4.16541	3
Macula_INL_Nasal_outer	35.7273	36	34	38	30	41	2.96297	2
Macula_INL_Superior_Inner	40.6364	41	37	44	33	48	4.3594	3
Macula_INL_Superior_outer	31.8636	31.5	30	34	28	36	2.41613	1.5
Macula_INL_Temporal_Inner	39.2727	38.5	37	43	33	45	3.60135	3
Macula_INL_Temporal_outer	34.4545	34.5	32	36	30	39	2.84065	2.5
Macula_IPL_Fovea	21.2273	21.5	18	23	13	33	4.74022	3
Macula_IPL_Inferior_Inner	35.2273	36	32	39	21	46	6.41376	4
Macula_IPL_Inferior_outer	22.5455	22	21	24	19	28	2.30377	1.5
Macula_IPL_mean_Inner	36.5455	37	33.5	38.25	30	44.25	3.79899	3
Macula_IPL_mean_Outer	25.5114	25.875	24.75	27	21	28.5	1.85241	1.125
Macula_IPL_Nasal_Inner	38.7727	38.5	36	42	29	46	3.96331	3
Macula_IPL_Nasal_outer	29.5	30	27	31	24	34	2.46403	1.5
Macula_IPL_Superior_Inner	37.5909	38	34	41	28	43	4.13647	3.5
Macula_IPL_Superior_outer	23.0909	23.5	22	25	17	26	2.38865	1.5
Macula_IPL_Temporal_Inner	34.5909	34	32	37	22	46	5.22502	3
Macula_IPL_Temporal_outer	26.9091	27	26	29	19	31	2.84369	1
Macula_IRL_Fovea	182.545	188.5	168	194	150	218	17.9463	11.5
Macula_IRL_Inferior_Inner	244.636	246	234	260	206	277	20.4114	13
Macula_IRL_Inferior_outer	188.318	186	179	199	162	215	14.0962	9
Macula_IRL_mean_Inner	246.182	249	235.5	253	221.5	269.75	12.9008	8.625
Macula_IRL_mean_outer	203.273	203.875	196.75	208.75	184.75	223.75	9.56927	6.25
Macula_IRL_Nasal_Inner	256.818	258.5	250	269	224	279	14.4705	9.5
Macula_IRL_Nasal_outer	231.636	234.5	221	240	210	258	11.8946	7
Macula_IRL_Superior_Inner	250.364	249	239	263	228	273	12.7673	11
Macula_IRL_Superior_outer	199.227	200	191	207	179	218	9.92799	7
Macula_IRL_Temporal_Inner	232.909	232	225	242	201	259	14.4153	9
Macula_IRL_Temporal_outer	193.909	193	182	200	169	216	12.3593	8.5
Macula_ONL_Fovea	94.3182	95.5	89	100	69	113	9.96368	5.5
Macula_ONL_Inferior_Inner	69	74.5	61	77	36	88	13.6765	5
Macula_ONL_Inferior_outer	51.2273	52.5	47	57	35	65	8.64061	5
Macula_ONL_mean_Inner	73.1591	75.125	70.25	77.25	51.25	90.75	9.76344	4.375
Macula_ONL_mean_outer	57.3068	57	53.5	64.25	40	72.75	8.67945	5.375
Macula_ONL_Nasal_Inner	76.8182	80	74	82	40	96	12.6138	4.5
Macula_ONL_Nasal_outer	60.4091	60.5	55	68	37	78	10.8306	7.5
Macula_ONL_Superior_Inner	71.8636	71	68	78	55	87	8.24792	5.5
Macula_ONL_Superior_outer	58.9545	58	55	65	41	73	8.32939	4
Macula_ONL_Temporal_Inner	74.9545	74.5	71	81	61	92	8.27203	6
Macula_ONL_Temporal_outer	58.6364	59	53	63	46	76	8.2609	4.5
Macula_OPL_Fovea	22.1818	22	18	24	16	34	4.96307	3.5
Macula_OPL_Inferior_Inner	34.3182	30.5	29	37	27	51	7.39618	2.5
Macula_OPL_Inferior_outer	27.4091	27	26	29	25	31	1.68068	1
Macula_OPL_mean_Inner	32.1591	30.625	29	35	28.5	42.25	3.71175	1.875
Macula_OPL_mean_outer	28.2273	28.375	26.5	30	25.25	30.5	1.69893	1.625
Macula_OPL_Nasal_Inner	32.3636	30	28	34	27	62	7.51852	2
Macula_OPL_Nasal_outer	30.9091	30	28	31	26	41	4.18511	2
Macula_OPL_Superior_Inner	31.5909	30	29	34	28	39	3.41787	2
Macula_OPL_Superior_outer	26.6364	27	25	28	23	30	1.86562	1
Macula_OPL_Temporal_Inner	30.3636	29	28	33	24	37	3.48528	2
Macula_OPL_Temporal_outer	27.9545	27	26	29	24	36	3.06248	2
Macula_PHOTO_Fovea	86.9545	86	85	88	81	96	3.37325	1
Macula_PHOTO_Inferior_Inner	79.3636	79.5	78	81	76	84	2.1502	1.5
Macula_PHOTO_Inferior_outer	76	77	75	78	70	79	2.35028	1.5
Macula_PHOTO_mean_Inner	80.0455	80.125	79	80.75	77.25	84.25	1.87184	0.75
Macula_PHOTO_mean_outer	77.375	77.75	76	79	72.75	80.25	2.0233	1.25
Macula_PHOTO_Nasal_Inner	80.9545	81	80	83	78	85	1.83815	1.5
Macula_PHOTO_Nasal_outer	77.8182	78	77	79	73	81	2.03859	1
Macula_PHOTO_Superior_Inner	80.3182	80.5	79	82	76	85	2.41792	1.5
Macula_PHOTO_Superior_outer	78.5455	78.5	77	80	75	82	2.17622	1.5
Macula_PHOTO_Temporal_Inner	79.5455	80	78	80	76	84	2.08686	1
Macula_PHOTO_Temporal_outer	77.1364	77.5	75	79	72	81	2.14466	1.5
Macula_RETINA_Fovea	269.364	273	255	280	234	310	18.7808	8.5
Macula_RETINA_Inferior_Inner	324.182	325.5	314	339	287	357	20.5302	12.5
Macula_RETINA_Inferior_outer	264.364	261.5	253	278	234	288	14.6338	11.5
Macula_RETINA_mean_Inner	326.17	326.75	314.75	335.5	301.75	350.5	13.4205	9.5
Macula_RETINA_mean_Outer	280.648	281	270.5	286.5	264	302	10.1787	7.5
Macula_RETINA_Nasal_Inner	337.227	336	328	350	307	361	14.2726	9.5
Macula_RETINA_Nasal_outer	309.318	311.5	296	319	288	337	12.7032	9
Macula_RETINA_Superior_Inner	330.773	328	321	342	307	353	12.8357	10
Macula_RETINA_Superior_outer	277.864	279.5	269	285	260	298	10.2041	8
Macula_RETINA_Temporal_Inner	312.5	310.5	304	324	281	339	15.0167	10.5
Macula_RETINA_Temporal_outer	271.045	270.5	261	277	248	294	12.5716	8
Macula_RNFL_Fovea	12	12	9	15	7	18	3.26599	3
Macula_RNFL_Inferior_Inner	22.5	24	19	25	15	27	3.56905	2
Macula_RNFL_Inferior_outer	28.6364	30	22	34	17	48	8.12137	6
Macula_RNFL_mean_Inner	20.9886	21	20	22	17.75	23.5	1.44436	1
Macula_RNFL_mean_outer	28.6932	28.875	25.25	31.5	22	38.5	4.41111	3.125
Macula_RNFL_Nasal_Inner	20.5909	20	19	22	17	23	1.68068	1
Macula_RNFL_Nasal_outer	37.4091	37	33	41	28	49	5.43059	4
Macula_RNFL_Superior_Inner	23.1364	23	21	25	18	28	2.78252	2
Macula_RNFL_Superior_outer	30.5455	29	25	34	20	44	7.43049	4.5
Macula_RNFL_Temporal_Inner	17.7273	18	17	19	14	21	1.48586	1
Macula_RNFL_Temporal_outer	18.1818	18.5	18	19	14	21	1.7358	0.5
Macula_RPE_Fovea	17.0455	17	16	18	13	21	1.98752	1
Macula_RPE_Inferior_Inner	14.7727	15	14	16	12	17	1.47783	1
Macula_RPE_Inferior_outer	12.9091	13	12	14	11	15	1.1916	1
Macula_RPE_mean_Inner	15.0795	14.75	14.25	16	13.25	17.5	1.13228	0.75
Macula_RPE_mean_outer	13.2614	13	12.5	13.5	12	16	1.02492	0.5
Macula_RPE_Nasal_Inner	15.8182	16	15	17	13	18	1.53177	1
Macula_RPE_Nasal_outer	13.5455	13	13	14	12	16	1.05683	0
Macula_RPE_Superior_Inner	15.0909	15	14	16	13	18	1.41115	1
Macula_RPE_Superior_outer	13.5455	13	13	14	12	18	1.47122	1
Macula_RPE_Temporal_Inner	14.6364	15	14	15	13	17	1.0486	1
Macula_RPE_Temporal_outer	13.0455	13	12	13	12	15	0.950051	0
mean_GANGLION_CELL_LAYER	26.8462	27.3359	26.0625	27.875	23.0469	30.125	1.96616	0.960938
mean_INNER_NUCLEAR_LAYER	30.6362	30.2422	29.3281	31.8125	27.5312	34.8438	2.05621	1.25781
mean_INNER_PLEXIFORM_LAYER	23.6403	23.7578	22.8594	24.5156	20.0469	26.6875	1.36392	0.765625
mean_INNER_RETINAL_LAYER	194.839	195.406	189.234	199.328	177.375	215.031	8.82061	4.39062
mean_OUTER_NUCLEAR_LAYER	53.7486	55.125	49.6875	60.125	28.8906	66.4219	9.38059	5.21875
mean_OUTER_PLEXIFORM_LAYER	27.3942	27.4062	26.4844	28.2812	24.6719	30.4688	1.33617	0.914062
mean_PHOTORECEPTORS	77.3438	77.6719	75.7188	78.75	73.5625	86.5938	2.82002	1.26562
mean_RET_PIGMENT_EPITHELIUM	13.1761	12.6797	12.375	13.0625	11.9219	19.2031	1.584	0.382812
mean_Retina	272.602	274.273	262.859	278.328	256.297	293.391	9.82606	5.25
mean_RNFL	31.3284	32.0312	26.0625	35.7812	22.7812	43.0781	5.37025	4.17188
RNFLT__N	59.7727	58.5	55	65	42	86	10.0472	5.5
RNFLT_G	67.4091	61.5	58	72	45	152	21.2416	6.5
RNFLT_NI	64.9545	62	56	73	36	95	14.2844	8.5
RNFLT_NS	68.4091	67	59	79	37	109	17.5327	10.5
RNFLT_T	50.5455	50.5	45	56	33	66	7.84206	5.5
RNFLT_TI	82	85.5	56	99	21	131	29.6166	24
RNFLT_TS	77.6364	79.5	66	96	35	112	21.1019	15
VFI	91.3182	92	86	96	82	99	5.45446	4.5
Descriptive statistics advanced stages group
Index	Mean	Median	InterquartileRange_low	InterquartileRange_high	Min	Max	StandardDeviation	MedianDeviation
BMO_G	130.593	128	100	150	68	229	42.7302	22
BMO_N	159.444	154	114	193	50	279	59.3875	39
BMO_NI	163.704	146	116	177	56	387	78.7849	31
BMO_NS	143.481	133	99	171	68	276	56.2777	35
BMO_T	105.667	106	66	147	39	168	43.3075	41
BMO_TI	101.296	81	49	159	23	261	67.2526	38
BMO_TS	90.1852	78	57	124	37	188	40.0807	28
Macula_GCL_Fovea	10.3333	9	8	13	6	18	2.82843	1
Macula_GCL_Inferior_Inner	27.5926	22	19	39	14	50	10.9413	5
Macula_GCL_Inferior_outer	21.1111	21	17	25	15	30	4.74206	4
Macula_GCL_mean_Inner	28.6204	27.75	22.5	36.5	18	44.25	7.3633	5.5
Macula_GCL_mean_Outer	22.9074	22.5	20.75	25.75	16.25	30.75	3.50422	2.25
Macula_GCL_Nasal_Inner	33.8889	37	27	42	16	51	9.99359	7
Macula_GCL_Nasal_outer	28.963	30	25	33	19	39	5.27316	4
Macula_GCL_Superior_Inner	30.9259	30	22	37	17	52	8.89652	7
Macula_GCL_Superior_outer	21.963	22	20	24	14	38	4.68616	2
Macula_GCL_Temporal_Inner	22.0741	20	18	27	14	39	6.2507	4
Macula_GCL_Temporal_outer	19.5926	19	17	22	14	28	3.83566	3
Macula_INL_Fovea	21.1481	19	17	24	13	40	6.17503	3
Macula_INL_Inferior_Inner	43.4444	43	39	46	37	56	4.878	3
Macula_INL_Inferior_outer	32.6667	32	30	34	27	42	3.01279	2
Macula_INL_mean_Inner	42.8796	42.75	39.25	45.75	35.5	53.5	4.22411	3.25
Macula_INL_mean_outer	34.8519	34.25	32.75	37	30.5	42.5	2.8439	2.25
Macula_INL_Nasal_Inner	43.6296	44	40	46	36	55	4.50767	3
Macula_INL_Nasal_outer	37.8148	37	36	40	32	47	3.59526	1
Macula_INL_Superior_Inner	44.1111	44	41	48	35	57	5.28665	3
Macula_INL_Superior_outer	33.8148	34	32	36	27	43	3.34016	2
Macula_INL_Temporal_Inner	40.3333	41	37	43	32	49	4.19707	2
Macula_INL_Temporal_outer	35.1111	36	33	37	29	40	3.02977	3
Macula_IPL_Fovea	18.4444	18	17	21	15	24	2.48586	2
Macula_IPL_Inferior_Inner	28.3333	26	24	33	21	41	5.99359	3
Macula_IPL_Inferior_outer	22.6296	22	21	23	18	32	3.0019	1
Macula_IPL_mean_Inner	29.0926	28.5	26	32.25	21.5	39.5	4.58947	2.75
Macula_IPL_mean_Outer	23.7963	23.25	22.5	24.75	18.75	30.25	2.54294	1
Macula_IPL_Nasal_Inner	31.8519	34	27	36	19	43	6.47898	5
Macula_IPL_Nasal_outer	25.963	27	23	29	18	33	3.42481	2
Macula_IPL_Superior_Inner	30.3333	31	27	34	21	39	4.31455	3
Macula_IPL_Superior_outer	22.8519	22	21	24	17	34	3.7897	2
Macula_IPL_Temporal_Inner	25.8519	25	22	27	20	39	4.84136	3
Macula_IPL_Temporal_outer	23.7407	23	21	25	19	29	2.75391	2
Macula_IRL_Fovea	180.667	176	167	188	155	227	18.2019	10
Macula_IRL_Inferior_Inner	223.926	220	209	232	197	261	19.01	11
Macula_IRL_Inferior_outer	175.926	173	167	186	155	205	13.0765	8
Macula_IRL_mean_Inner	227.787	226	217	237.5	209.75	256	13.5982	11.25
Macula_IRL_mean_outer	189.602	188.25	179.75	196.25	176.75	215.25	11.0385	8
Macula_IRL_Nasal_Inner	240.074	237	228	257	217	273	16.5086	9
Macula_IRL_Nasal_outer	209.704	208	199	221	191	245	15.3393	9
Macula_IRL_Superior_Inner	231.481	230	219	239	211	267	13.9625	9
Macula_IRL_Superior_outer	187.481	185	179	188	169	236	14.1703	5
Macula_IRL_Temporal_Inner	215.667	212	206	226	198	243	12.5484	8
Macula_IRL_Temporal_outer	185.296	183	175	192	166	207	11.1969	8
Macula_ONL_Fovea	99.1481	99	90	108	79	125	10.9041	9
Macula_ONL_Inferior_Inner	72	70	67	78	56	90	9.30674	5
Macula_ONL_Inferior_outer	51.8148	50	47	54	42	64	6.67969	4
Macula_ONL_mean_Inner	74.1574	73.75	68.75	78.75	59.75	92.75	7.48176	5
Macula_ONL_mean_outer	57.8056	56.75	53.25	60.5	50	71.5	6.2605	3.5
Macula_ONL_Nasal_Inner	73.2963	75	70	80	39	98	13.2137	5
Macula_ONL_Nasal_outer	58.7778	59	54	64	43	75	8.07338	5
Macula_ONL_Superior_Inner	71.8889	73	65	78	59	91	8.50038	7
Macula_ONL_Superior_outer	60.2593	59	55	63	52	75	6.16811	4
Macula_ONL_Temporal_Inner	79.4444	77	74	85	65	98	8.49132	5
Macula_ONL_Temporal_outer	60.3704	60	54	64	48	75	7.28089	5
Macula_OPL_Fovea	22.5556	22	20	26	16	31	4.0128	3
Macula_OPL_Inferior_Inner	32.1852	32	30	33	26	39	3.45339	2
Macula_OPL_Inferior_outer	27.2593	27	26	28	24	31	1.93336	1
Macula_OPL_mean_Inner	33.3704	32.25	30.75	36	27.75	41.75	3.7038	2.25
Macula_OPL_mean_outer	28.7407	28.25	27.25	30	25.75	33.75	2.0691	1.5
Macula_OPL_Nasal_Inner	37.5926	33	29	39	27	66	12.2514	5
Macula_OPL_Nasal_outer	32.3333	31	28	34	25	46	5.85071	3
Macula_OPL_Superior_Inner	33.963	32	30	38	25	48	6.1861	2
Macula_OPL_Superior_outer	27.3333	27	26	29	24	34	2.49615	1
Macula_OPL_Temporal_Inner	29.7407	29	27	32	24	37	3.40353	2
Macula_OPL_Temporal_outer	28.037	28	27	29	25	34	1.87045	1
Macula_PHOTO_Fovea	87.4815	87	86	90	78	99	5.06398	2
Macula_PHOTO_Inferior_Inner	80.7407	80	78	82	77	91	3.34655	2
Macula_PHOTO_Inferior_outer	77.5926	78	75	79	73	85	2.9776	2
Macula_PHOTO_mean_Inner	81.5556	81.5	79.25	82.5	77	92.25	3.40131	2
Macula_PHOTO_mean_outer	78.463	78.75	76.5	79.5	74.25	85.5	2.6645	1.75
Macula_PHOTO_Nasal_Inner	82.3333	82	79	85	76	94	4.0096	3
Macula_PHOTO_Nasal_outer	78.7037	78	77	80	73	85	2.94586	2
Macula_PHOTO_Superior_Inner	82.2593	82	80	84	77	94	3.66472	2
Macula_PHOTO_Superior_outer	79.2963	79	76	81	75	87	2.93277	2
Macula_PHOTO_Temporal_Inner	80.8889	80	79	83	75	90	3.38927	2
Macula_PHOTO_Temporal_outer	78.2593	78	77	79	74	85	2.52057	1
Macula_RETINA_Fovea	268.481	264	251	283	242	317	19.1218	13
Macula_RETINA_Inferior_Inner	304.889	299	288	319	275	344	19.7996	13
Macula_RETINA_Inferior_outer	253.704	250	242	266	231	283	14.4324	9
Macula_RETINA_mean_Inner	309.352	305.75	296	319.5	291.75	337.5	14.2144	10.75
Macula_RETINA_mean_Outer	268.074	265	257.25	274.5	251.5	292.75	11.9407	9.25
Macula_RETINA_Nasal_Inner	322.185	320	308	338	301	355	16.7425	13
Macula_RETINA_Nasal_outer	288.333	287	277	300	267	325	15.5242	11
Macula_RETINA_Superior_Inner	313.667	312	303	321	293	346	13.8397	9
Macula_RETINA_Superior_outer	266.704	264	258	270	246	314	14.6781	6
Macula_RETINA_Temporal_Inner	296.667	291	287	310	279	322	13.5533	8
Macula_RETINA_Temporal_outer	263.556	260	252	276	247	284	12.0139	9
Macula_RNFL_Fovea	10.2222	10	8	12	6	15	2.40725	2
Macula_RNFL_Inferior_Inner	20.4815	20	19	22	15	27	2.6656	2
Macula_RNFL_Inferior_outer	20.8148	19	17	24	16	35	4.8281	2
Macula_RNFL_mean_Inner	19.6296	19.75	18.25	20.5	17	22.75	1.63256	1
Macula_RNFL_mean_outer	21.6296	21	19	24.5	17.25	27.75	3.14961	2.75
Macula_RNFL_Nasal_Inner	19.6667	20	18	21	14	27	2.54196	1
Macula_RNFL_Nasal_outer	25.8889	25	20	31	17	36	5.99572	5
Macula_RNFL_Superior_Inner	20	20	18	21	15	25	2.40192	1
Macula_RNFL_Superior_outer	21.2222	19	17	24	16	41	5.51455	2
Macula_RNFL_Temporal_Inner	18.3704	19	17	20	14	22	2.07824	1
Macula_RNFL_Temporal_outer	18.5926	18	17	20	14	24	2.51548	1
Macula_RPE_Fovea	17.0741	17	16	18	13	21	1.70803	1
Macula_RPE_Inferior_Inner	14.7778	15	13	16	12	18	1.60128	1
Macula_RPE_Inferior_outer	13.3704	13	13	14	11	16	1.39085	1
Macula_RPE_mean_Inner	15.3889	15.5	14.25	16.75	12.25	18.75	1.40112	1.25
Macula_RPE_mean_outer	13.7963	13.75	12.75	14.75	12	16.5	1.18897	1
Macula_RPE_Nasal_Inner	16.0741	16	15	17	12	20	1.92005	1
Macula_RPE_Nasal_outer	14.1111	14	13	15	11	17	1.60128	1
Macula_RPE_Superior_Inner	15.4074	15	14	16	13	19	1.36605	1
Macula_RPE_Superior_outer	13.963	14	13	15	12	17	1.34397	1
Macula_RPE_Temporal_Inner	15.2963	15	14	16	12	18	1.5396	1
Macula_RPE_Temporal_outer	13.7407	14	13	15	12	16	1.09519	1
mean_GANGLION_CELL_LAYER	21.7437	21.4062	19.7969	24.1406	16.0312	27.5323	2.86293	1.65625
mean_INNER_NUCLEAR_LAYER	31.7569	31.3594	30.0469	33.2656	28.1406	37.0212	2.17969	1.875
mean_INNER_PLEXIFORM_LAYER	22.2981	21.7656	21.0156	23.0156	18.7656	27.5806	1.96622	1.01562
mean_INNER_RETINAL_LAYER	181.624	180.484	172.453	188.766	168.797	203.266	10.2618	8.03125
mean_OUTER_NUCLEAR_LAYER	56.3719	55.2344	52.0781	58.9032	49.3281	69.5938	5.5508	3.15625
mean_OUTER_PLEXIFORM_LAYER	27.3561	26.8438	26.129	28.2969	25.3871	30.75	1.48484	0.90625
mean_PHOTORECEPTORS	78.0099	78.1406	75.9531	79.1406	73.8281	84.6094	2.54766	1.54688
mean_RET_PIGMENT_EPITHELIUM	13.4271	13.5	12.4375	14.125	11.3438	15.5312	1.08693	0.859375
mean_Retina	259.49	256.109	250.641	266.094	244.609	281.062	10.8137	8.21875
mean_RNFL	22.0009	20.6562	19.5156	25.1562	17.0625	29.2656	3.53004	1.95312
RNFLT__N	42.7407	45	34	52	21	61	10.9073	9
RNFLT_G	45.3333	47	39	51	33	60	7.63091	6
RNFLT_NI	47.9259	47	36	54	22	87	15.884	9
RNFLT_NS	56.037	52	42	68	29	119	20.551	10
RNFLT_T	39.3704	40	34	46	24	63	8.60299	6
RNFLT_TI	52.8889	44	38	66	18	115	21.9358	13
RNFLT_TS	43.7778	39	31	57	19	90	16.4722	9
VFI	42.6667	49	13	66	1	81	27.1251	18
Correlation with VFI	P-value	Index
1	0	VFI
0.788534	1.128e-35	Macula_GCL_Temporal_Inner
0.77637	8.41474e-33	Macula_IPL_Temporal_Inner
0.814631	5.66296e-31	Macula_GCL_mean_Inner
0.733315	1.76068e-30	mean_RNFL
0.705236	4.58085e-30	Macula_RNFL_mean_outer
0.755083	1.05638e-29	mean_GANGLION_CELL_LAYER
0.753764	1.16127e-29	Macula_GCL_mean_Outer
0.722573	5.63735e-29	Macula_GCL_Temporal_outer
0.767308	4.96548e-28	Macula_IPL_mean_Inner
0.748657	1.47958e-27	Macula_RNFL_Nasal_outer
0.448092	3.61693e-27	RNFLT_G
0.7649	1.55401e-25	Macula_GCL_Inferior_Inner
0.428305	1.58652e-24	RNFLT_NI
0.593489	7.22764e-24	Macula_IPL_Temporal_outer
0.581116	4.63903e-23	RNFLT_TI
0.648487	1.02709e-22	Macula_RNFL_Inferior_outer
0.67432	2.09809e-22	Macula_GCL_Inferior_outer
0.377976	2.94783e-22	RNFLT__N
0.522561	7.37619e-22	RNFLT_TS
0.626789	7.57941e-22	Macula_IRL_Temporal_Inner
0.647548	7.18188e-21	BMO_TI
0.604823	4.8817e-20	BMO_TS
0.588043	2.20989e-19	Macula_RETINA_Temporal_Inner
0.776452	2.24654e-19	Macula_GCL_Superior_Inner
0.642784	2.99087e-19	BMO_G
0.697906	3.26052e-19	Macula_IPL_Inferior_Inner
0.641046	5.62854e-18	BMO_T
0.676445	5.8126e-18	Macula_IPL_Superior_Inner
0.311599	2.08819e-17	RNFLT_T
0.51751	2.4198e-17	Macula_RNFL_Inferior_Inner
0.612907	3.17095e-17	Macula_RNFL_Superior_outer
0.579138	4.60358e-17	mean_INNER_RETINAL_LAYER
0.63119	1.15259e-16	Macula_IRL_mean_Inner
0.569311	2.55021e-16	BMO_NS
0.475596	4.39063e-16	Macula_RNFL_mean_Inner
0.594593	5.63234e-16	Macula_RETINA_mean_Inner
0.653904	9.88718e-16	Macula_GCL_Superior_outer
0.712264	1.2689e-15	Macula_GCL_Nasal_Inner
0.548304	2.16594e-15	mean_Retina
0.421684	5.77662e-15	RNFLT_NS
0.585913	7.76229e-15	Macula_RETINA_Inferior_Inner
0.604621	1.54105e-14	Macula_IRL_Superior_Inner
0.593277	1.83367e-14	BMO_NI
0.49232	1.8717e-14	Macula_RNFL_Superior_Inner
0.544488	7.80334e-14	Macula_IRL_mean_outer
0.712651	7.93412e-14	Macula_GCL_Nasal_outer
0.681159	8.65015e-14	Macula_IPL_Nasal_Inner
0.515269	1.03893e-13	Macula_IRL_Inferior_outer
0.428263	1.65659e-13	Macula_IPL_mean_Outer
0.585863	2.6528e-13	Macula_IRL_Inferior_Inner
0.605702	2.9022e-13	BMO_N
0.565517	3.9291e-13	Macula_RETINA_Superior_Inner
0.503993	3.78941e-12	Macula_RETINA_mean_Outer
0.462188	9.89004e-12	Macula_RETINA_Inferior_outer
0.423365	1.99719e-11	mean_INNER_PLEXIFORM_LAYER
0.431137	1.17682e-10	Macula_IRL_Temporal_outer
0.594553	3.26542e-10	Macula_RETINA_Nasal_outer
0.619937	3.80994e-10	Macula_IRL_Nasal_outer
0.431341	1.13299e-09	Macula_IRL_Superior_outer
0.397293	2.63478e-09	Macula_RETINA_Temporal_outer
0.409716	5.243e-09	Macula_RETINA_Superior_outer
0.549295	9.43399e-09	Macula_IRL_Nasal_Inner
0.507688	1.01635e-08	Macula_RETINA_Nasal_Inner
0.495175	3.22531e-08	Macula_GCL_Fovea
0.49567	8.68094e-08	Macula_IPL_Nasal_outer
0.496385	8.83664e-08	Macula_RNFL_Fovea
0.443399	4.02262e-07	Macula_IPL_Fovea
0.150036	3.74249e-06	Macula_IPL_Superior_outer
0.109739	6.13518e-06	Macula_IPL_Inferior_outer
-0.346228	0.00019082	Macula_INL_Nasal_outer
0.35593	0.000214254	Macula_RNFL_Nasal_Inner
-0.346398	0.000301304	Macula_INL_mean_outer
-0.337772	0.000482196	Macula_INL_Superior_outer
-0.284338	0.00121503	Macula_INL_Inferior_outer
-0.374701	0.00479229	Macula_ONL_Temporal_Inner
0.161796	0.00531538	Macula_RETINA_Fovea
-0.404491	0.00667459	Macula_INL_Inferior_Inner
0.227912	0.00716135	Macula_OPL_Fovea
-0.287124	0.00763185	Macula_ONL_Superior_Inner
-0.30085	0.00978021	Macula_ONL_mean_Inner
0.0988239	0.0113041	Macula_RNFL_Temporal_outer
-0.256946	0.0172672	Macula_ONL_Inferior_Inner
0.166593	0.0184941	Macula_IRL_Fovea
-0.352944	0.019095	Macula_INL_mean_Inner
-0.338481	0.0195974	Macula_INL_Superior_Inner
0.166964	0.0222488	Macula_OPL_Temporal_Inner
0.0871858	0.0235326	mean_OUTER_PLEXIFORM_LAYER
-0.283308	0.0421075	mean_INNER_NUCLEAR_LAYER
-0.232599	0.0440252	Macula_INL_Temporal_outer
0.102448	0.047591	Macula_OPL_mean_Inner
0.189994	0.0557709	Macula_OPL_Inferior_Inner
-0.231011	0.0857377	mean_OUTER_NUCLEAR_LAYER
0.0782185	0.090528	Macula_OPL_Inferior_outer
-0.250622	0.0953184	Macula_INL_Nasal_Inner
-0.235756	0.103241	Macula_INL_Temporal_Inner
0.0186139	0.108519	Macula_OPL_mean_outer
-0.204708	0.110726	Macula_ONL_Superior_outer
0.0679545	0.127299	Macula_OPL_Superior_Inner
-0.0192421	0.155762	Macula_PHOTO_Fovea
-0.343234	0.163328	Macula_ONL_Fovea
-0.104166	0.192472	Macula_ONL_Nasal_outer
0.0652796	0.231179	Macula_OPL_Temporal_outer
-0.319902	0.252112	Macula_PHOTO_Superior_Inner
-0.158513	0.25989	Macula_ONL_Temporal_outer
-0.154209	0.262379	Macula_ONL_mean_outer
-0.161582	0.279033	Macula_RNFL_Temporal_Inner
-0.221818	0.29271	Macula_RPE_Nasal_outer
-0.114421	0.326793	Macula_ONL_Inferior_outer
-0.202793	0.404224	Macula_RPE_Temporal_outer
-0.132343	0.410561	mean_RET_PIGMENT_EPITHELIUM
-0.0966729	0.503313	Macula_ONL_Nasal_Inner
-0.185431	0.515442	Macula_RPE_mean_outer
-0.127985	0.548323	Macula_RPE_Inferior_outer
0.0300066	0.552003	Macula_OPL_Superior_outer
-0.193695	0.556107	Macula_PHOTO_Inferior_Inner
-0.00313818	0.584714	Macula_RPE_Inferior_Inner
-0.128939	0.624268	mean_PHOTORECEPTORS
-0.287572	0.646834	Macula_PHOTO_Nasal_Inner
-0.190244	0.696642	Macula_RPE_Nasal_Inner
-0.0535031	0.698119	Macula_OPL_Nasal_outer
-0.0686433	0.715667	Macula_OPL_Nasal_Inner
-0.150961	0.741337	Macula_RPE_Superior_Inner
-0.213437	0.753265	Macula_PHOTO_Temporal_outer
-0.116524	0.756365	Macula_RPE_Temporal_Inner
-0.163975	0.803851	Macula_PHOTO_Superior_outer
-0.273222	0.867075	Macula_PHOTO_mean_Inner
-0.217752	0.881078	Macula_PHOTO_Inferior_outer
-0.0301331	0.948905	Macula_RPE_Fovea
-0.101349	0.954538	Macula_INL_Fovea
-0.106463	0.957593	Macula_RPE_Superior_outer
-0.205102	0.959274	Macula_PHOTO_mean_outer
-0.160463	0.970112	Macula_PHOTO_Nasal_outer
-0.206261	0.979125	Macula_PHOTO_Temporal_Inner
-0.132918	0.988416	Macula_RPE_mean_Inner
